# Supplementary material for: Sex-associated differences in baseline urinary metabolites of healthy adults
Source: PubMed Central journal article supplement (PMC6082868; doi:10.1038/s41598-018-29592-3), 2018-08-08
Supplement: 41598_2018_29592_MOESM1_ESM.pdf [file 41598_2018_29592_MOESM1_ESM.pdf]

## **Sex-associated differences in baseline urinary metabolites of healthy adults**

Sili Fan<sup>1</sup>, Austin Yeon<sup>2</sup>, Muhammad Shahid<sup>2</sup>, Jennifer T. Anger<sup>3</sup>, Karyn S. Eilber<sup>3</sup>,  
Oliver Fiehn<sup>1,4</sup>, Jayoung Kim<sup>2,5,6,7,8,†</sup>

<sup>1</sup>West Coast Metabolomics Center, University of California, Davis, CA, USA; <sup>2</sup>Departments of Surgery, Cedars-Sinai Medical Center, Los Angeles, CA; <sup>3</sup>Division of Urology, Department of Surgery, Cedars-Sinai Medical Center, Los Angeles, CA, USA; <sup>4</sup>King Abdulaziz University, Jeddah, Saudi Arabia; <sup>5</sup>Departments of Surgery and Biomedical Sciences, Cedars-Sinai Medical Center, Los Angeles, CA; <sup>6</sup>Samuel Oschin Comprehensive Cancer Institute, Cedars-Sinai Medical Center, Los Angeles, CA, USA; <sup>7</sup>University of California Los Angeles, CA, USA; <sup>8</sup>Department of Urology, Ga Cheon University College of Medicine, Incheon, Republic of Korea

### **†Correspondence:**

Jayoung Kim, PhD.

Departments of Surgery and Biomedical Sciences, Cedars-Sinai Medical Center, 8700 Beverly Blvd., Los Angeles, CA 90048

Tel: +1-310-423-7168 Fax: +1-310-967-3809

E-mail: Jayoung.Kim@cshs.org

### **Key words:**

urinary biomarkers; mass spectrometry; metabolomics; healthy adults, interstitial cystitis

## SUPPLEMENTARY LEGENDS

**Supplementary Figure 1. Metabolite Set Enrichment Analysis (MSEA)** Summary plot (A) and table (B) for the MSEA are ranked by Holm p-value. The horizontal bars summarize the main metabolite sets identified in this analysis; the bars are colored based on their p-values and the length is based on the -fold enrichment.

## A Enrichment Overview (top 50)

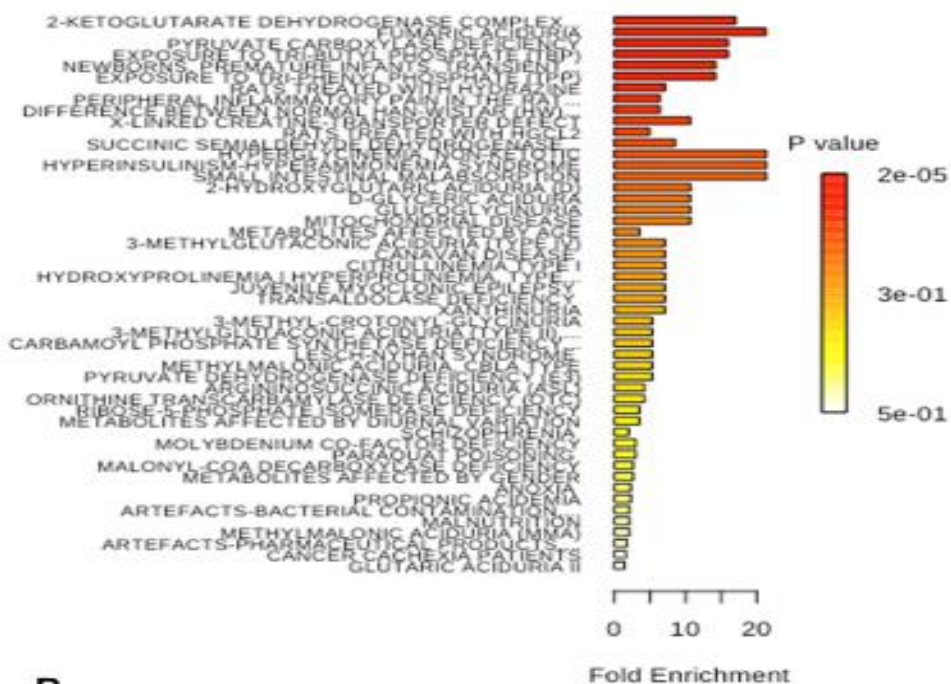

## B

|   |                                                                                   | total | expected | hits | Raw p    | Holm p  | FDR     |
|---|-----------------------------------------------------------------------------------|-------|----------|------|----------|---------|---------|
| 1 | 2-KETOGLUTARATE DEHYDROGENASE COMPLEX DEFICIENCY                                  | 5     | 0.235    | 4    | 1.81E-05 | 0.00524 | 0.00524 |
| 2 | FUMARIC ACIDURIA                                                                  | 3     | 0.141    | 3    | 9.09E-05 | 0.0263  | 0.0132  |
| 3 | PYRUVATE CARBOXYLASE DEFICIENCY                                                   | 4     | 0.188    | 3    | 0.000352 | 0.101   | 0.0255  |
| 4 | EXPOSURE TO TRI-BUTYL PHOSPHATE (TBP)                                             | 4     | 0.188    | 3    | 0.000352 | 0.101   | 0.0255  |
| 5 | NEWBORNS, PREMATURE INFANTS, TRANSIENT IMMATURETY OF TRANSPORT SYSTEMS OR ENZYMES | 3     | 0.141    | 2    | 0.00615  | 1       | 0.262   |

**Supplementary Table 1. Metabolomics data**

**Supplementary Table 2. Quality control data. We calculated the relative standard deviation of these QC samples. The median of RSD of QC was 24.5%.**
